# Supplementary material for: Identification of Cdk8 and Cdkn2d as New Prame-Target Genes in 2C-like Embryonic Stem Cells
Source: Genes (Basel). 2022 Sep 27;13(10):1745. doi: 10.3390/genes13101745 (PMC9601988; doi:10.3390/genes13101745)

**Figure S1. (A)** The enriched regions after anti-Flag antibody immunoprecipitation are indicated in the table after the UCSC genome browser analysis. **(B)** Pie chart showing the distribution of all binding sites for Prame.

A)

| Location     | Query Peak   | Number | Proportion | EnrichTest1 | EnrichTest2 | Comparison Peak |
|--------------|--------------|--------|------------|-------------|-------------|-----------------|
| Upstream     | Q-Upstream   | 4      | 6,7%       | 9,59E-01    | 6,45E-01    | C-Upstream      |
| 5' UTR       | Q-5UTR       | 0      | 0,0%       | 1,00E+00    | 1,00E+00    | C-5UTR          |
| Exons/CDS    | Q-Exon       | 1      | 1,7%       | 8,68E-01    | 6,71E-01    | C-Exon          |
| Introns      | Q-Intron     | 23     | 38,3%      | NA          | 9,59E-01    | C-Intron        |
| 3' UTR       | Q-3UTR       | 6      | 10,0%      | 3,57E-03    | 1,69E-04    | C-3UTR          |
| Downstream   | Q-Downstream | 9      | 15,0%      | 4,14E-01    | 3,69E-02    | C-Downstream    |
| Unclassified | NA           | 17     | 28,3%      | NA          | NA          | NA              |

B)

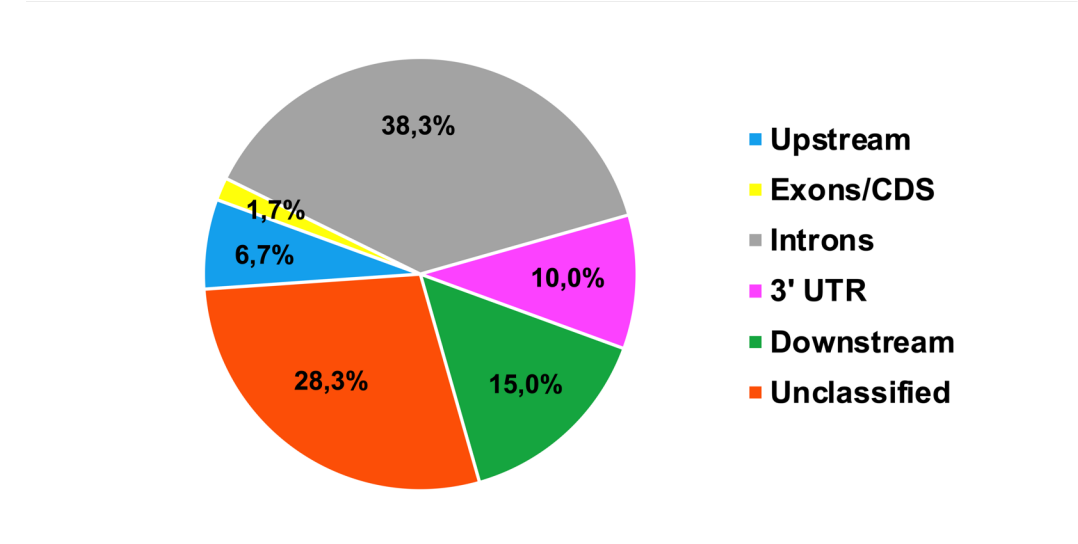

Supplement: Supplementary file 1 [file genes-13-01745-s001.zip › genes-1877783-supplementary.pdf]
